# Supplementary material for: Transcriptome changes in ERGIC3-knockdown hepatocellular carcinoma cells: ERGIC3 is a novel immune function related gene
Source: PeerJ journal article supplement (doi:10.7717/peerj.13369), 2022-05-17

# 细胞 STR 检测报告

## 一、检测样品

样品名称：SMMC-7721

样品编号：BNCC 338089

## 二、检测项目：STR 基因型检验

三、检测方法：用 Axygen 的基因组抽提试剂盒提取 DNA，采用 21-STR 扩增方案扩增，在 ABI 3730XL 型遗传分析仪上对 STR 位点和性别基因 Amelogenin 进行检测。

## 四、检验结果：

### 1, 检验基本情况

| 编号     | 多等位基因 | 匹配细胞系    | 细胞库 | EV 值 | 匹配说明 |
|--------|-------|----------|-----|------|------|
| 338089 | 有     | SMMC7721 | CRC | 1.00 | 完全匹配 |

多等位基因指三等位及以上基因现象。

本次检测各细胞分型结果良好。

### 2, 样本描述

BNCC 338089：该株细胞 DNA 分型在细胞系检索中找到基本匹配的细胞系，CRC 数据库显示细胞名为 SMMC7721 细胞号对应 3111C0001CCC000087。本次检测在该细胞系中发现多等位基因。

**备注：**待测细胞系与收录于 ATCC, DSMZ, JCRB 和 RIKEN 数据库的细胞系 STR 数据进行比对，未收录于以上细胞库的细胞系将无法匹配。

附表: SMMC7721 细胞的 STR 位点和 Amelogenin 位点的基因分型结果

| SMMC-7721 细胞 |          |          |          |
|--------------|----------|----------|----------|
| Marker       | Allele 1 | Allele 2 | Allele 3 |
| D5S818       | 12       | 12       |          |
| D13S317      | 13.3     | 13.3     |          |
| D7S820       | 12       | 12       |          |
| D16S539      | 9        | 10       |          |
| VWA          | 16       | 17       | 18       |
| TH01         | 7        | 7        |          |
| AMEL         | X        | X        |          |
| TPOX         | 12       | 12       |          |
| CSF1PO       | 10       | 10       |          |
| D12S391      | 20       | 25       |          |
| FGA          | 18       | 21       |          |
| D2S1338      | 17       | 17       |          |
| D21S11       | 27       | 28       |          |
| D18S51       | 13.2     | 16       |          |
| D8S1179      | 12       | 12       |          |
| D3S1358      | 15       | 18       |          |

附图：EXPASY 数据库比对结果

|             |                 |            |
|-------------|-----------------|------------|
| STR profile | <b>Markers:</b> |            |
|             | Amelogenin      | X          |
|             | CSF1PO          | 10         |
|             | D2S1338         | 17         |
|             | D3S1358         | 15, 18     |
|             | D5S818          | 11, 12     |
|             | D6S1043         | 18         |
|             | D7S820          | 12         |
|             | D8S1179         | 12         |
|             | D12S391         | 20, 25, 26 |
|             | D13S317         | 13, 3      |
|             | D16S539         | 9, 10      |
|             | D18S51          | 16         |
|             | D19S433         | 13         |
|             | D21S11          | 27, 28     |
|             | FGA             | 18, 21     |
|             | Penta D         | 8, 15      |
|             | Penta E         | 7, 17      |
|             | TH01            | 7          |
|             | TPOX            | 12         |
| vWA         | 16, 18          |            |

其他说明

分型方案及位点分布

|   | 方案 1    | 方案 2    | 方案 3    | 方案 4    |
|---|---------|---------|---------|---------|
| 1 | D3S1358 | D8S1179 | D19S433 | AMEL    |
| 2 | VWA     | D21S11  | TH01    | D1S1656 |
| 3 | D7S820  | D16S539 | D13S317 | D5S818  |
| 4 | CSF1PO  | D2S1338 | TPOX    | D12S391 |
| 5 | PENTAE  | PENTAD  | D18S51  | FGA     |
| 6 |         |         | D6S1043 |         |

签发日期：2019. 1. 30

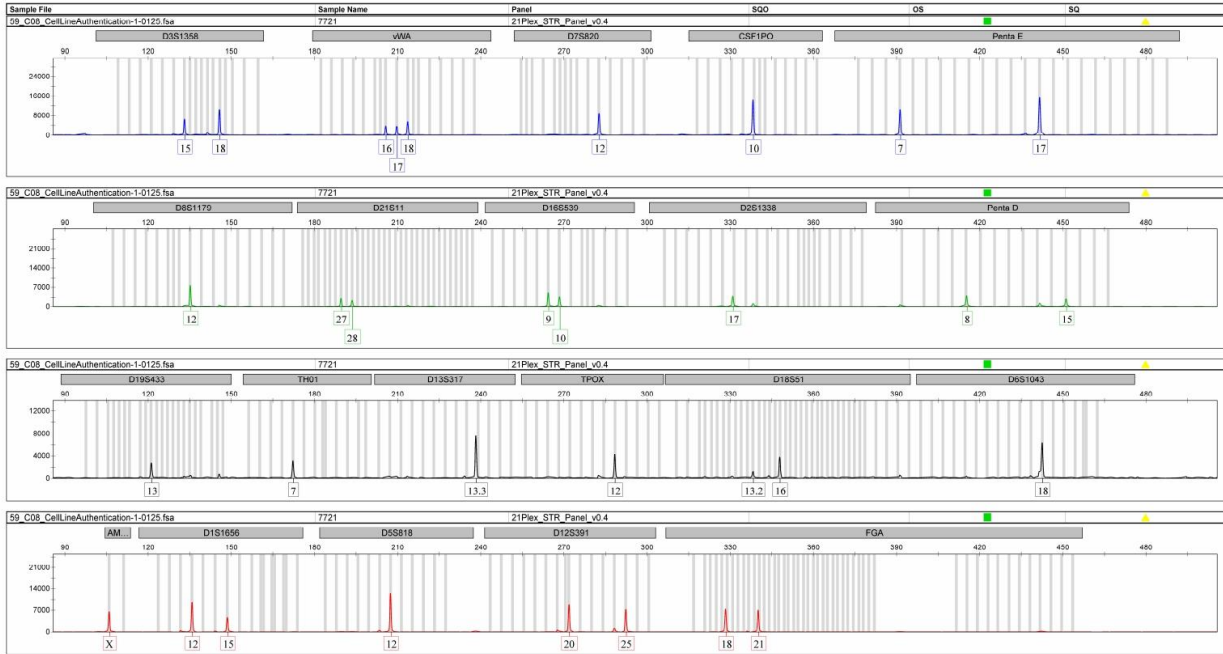

Supplement: STR-338089_SMMC-7721_CRC.pdf [file STR-338089_SMMC-7721_CRC.pdf]
