# Supplementary material for: Transcriptome changes in ERGIC3-knockdown hepatocellular carcinoma cells: ERGIC3 is a novel immune function related gene
Source: PeerJ. 2022 May 17;10:e13369. doi: 10.7717/peerj.13369 (PMC9121864; doi:10.7717/peerj.13369)
Supplement: Supplemental Information 1 [file peerj-10-13369-s001.xlsx]

## Sheet: Sheet1
gene	group	Ct	average	gene	group	Ct	ΔCt	average	ΔΔCt	2^-ΔΔCt	log2(fold chang)
Actin	control	16.53	16.3067	ERGIC3	control	21.97	5.66333	5.58333	0	1
Actin	control	16.23		ERGIC3	control	21.91	5.60333		0	1
Actin	control	16.16		ERGIC3	control	21.79	5.48333		0	1
Actin	ERGIC3i	16.1	15.9833	ERGIC3	ERGIC3i	25.49	9.50667		3.92333	0.0659112	-0.254885
Actin	ERGIC3i	15.93		ERGIC3	ERGIC3i	25.49	9.50667		3.92333	0.0659112	-0.254885
Actin	ERGIC3i	15.92		ERGIC3	ERGIC3i	25.1	9.11667		3.53333	0.0863696	-0.283019
gene	group	Ct	average	gene	group	Ct	ΔCt	average	ΔΔCt	2^-ΔΔCt	log2(fold chang)
Actin	control	17.19	17.1867	IL6	control	27.81	10.6233	10.44	0	1
Actin	control	17.33		IL6	control	27.49	10.3033		0	1
Actin	control	17.04		IL6	control	27.58	10.3933		0	1
Actin	ERGIC3i	16.89	16.9667	IL6	ERGIC3i	27.03	10.0633		-0.376667	1.29834	2.65487
Actin	ERGIC3i	17.04		IL6	ERGIC3i	27.06	10.0933		-0.346667	1.27162	2.88462
Actin	ERGIC3i	16.97		IL6	ERGIC3i	27.11	10.1433		-0.296667	1.2283	3.37079
				CXCL8	control	25.23	8.04333	7.94333	0	1
				CXCL8	control	25.02	7.83333		0	1
				CXCL8	control	25.14	7.95333		0	1
				CXCL8	ERGIC3i	24.68	7.71333		-0.23	1.17283	4.34783
				CXCL8	ERGIC3i	24.77	7.80333		-0.14	1.10191	7.14286
				CXCL8	ERGIC3i	24.75	7.78333		-0.16	1.11729	6.25
gene	group	Ct	average	gene	group	Ct	ΔCt	average	ΔΔCt	2^-ΔΔCt	log2(fold chang)
Actin	control	16.58	16.4967	CDKN1A	control	28.68	12.1833	12.0467	0	1
Actin	control	16.44		CDKN1A	control	28.54	12.0433		0	1
Actin	control	16.47		CDKN1A	control	28.41	11.9133		0	1
Actin	ERGIC3i	16.42	16.4533	CDKN1A	ERGIC3i	28.17	11.7167		-0.33	1.25701	3.0303
Actin	ERGIC3i	16.47		CDKN1A	ERGIC3i	28.12	11.6667		-0.38	1.30134	2.63158
Actin	ERGIC3i	16.47		CDKN1A	ERGIC3i	28.14	11.6867		-0.36	1.28343	2.77778
gene	group	Ct	average	gene	group	Ct	ΔCt	average	ΔΔCt	2^-ΔΔCt	log2(fold chang)
Actin	control	16.31	16.2233	LAMC2	control	34.12	17.8967	18.0533	0	1
Actin	control	16.27		LAMC2	control	34.43	18.2067		0	1
Actin	control	16.09		LAMC2	control	34.28	18.0567		0	1
Actin	ERGIC3i	15.88	15.8467	LAMC2	ERGIC3i	33.59	17.7433		-0.31	1.23971	3.22581
Actin	ERGIC3i	15.87		LAMC2	ERGIC3i	33.72	17.8733		-0.18	1.13288	5.55556
Actin	ERGIC3i	15.79		LAMC2	ERGIC3i	33.47	17.6233		-0.43	1.34723	2.32558
