# Supplementary material for: Transcriptome changes in ERGIC3-knockdown hepatocellular carcinoma cells: ERGIC3 is a novel immune function related gene
Source: PeerJ. 2022 May 17;10:e13369. doi: 10.7717/peerj.13369 (PMC9121864; doi:10.7717/peerj.13369)
Supplement: Supplemental Information 6 [file peerj-10-13369-s006.xlsx]

## Sheet: Sheet1
20170324
	group	Ct			average
GAPDH	NC	20.8	20.64	20.97	20.8033
	24hsiRNA	21.91	21.98	21.56	21.8167
	48hsiRNA	20.88	20.83	21.14	20.95
	group	Ct			average	ΔCt	ΔΔCt	2^-ΔΔCt
ERGIC3	NC	19.62	19.58	18.98	19.3933	-1.41	0	1
	24hsiRNA	23.42	22.98	23.73	23.3767	1.56	2.97	0.127627
	48hsiRNA	23.27	23.08	23.16	23.17	2.22	3.63	0.0807721
20170417
	group	Ct			average
GAPDH	NC	21.03	21.17	21.35	21.1833
	24hsiRNA	20.87	20.73	20.52	20.7067
	48hsiRNA	20.56	20.37	20.53	20.4867
	group	Ct			average	ΔCt	ΔΔCt	2^-ΔΔCt
ERGIC3	NC	20.54	20.53	21.24	20.77	-0.413333	0	1
	24hsiRNA	24.13	24.11	24.46	24.2333	3.52667	3.94	0.0651541
	48hsiRNA	24.43	24.56	24.24	24.41	3.92333	4.33667	0.0494918
20170502
	group	Ct			average
GAPDH	NC	21.76	21.59	21.14	21.4967
	24hsiRNA	21.51	21.76	21.47	21.58
	48hsiRNA	21.34	21.46	21.53	21.4433
	group	Ct			average	ΔCt	ΔΔCt	2^-ΔΔCt
ERGIC3	NC	20.96	21.49	21.15	21.2	-0.296667	0	1
	24hsiRNA	24.18	24.36	23.97	24.17	2.59	2.88667	0.135216
	48hsiRNA	24.47	23.86	24.42	24.25	2.80667	3.10333	0.11636
20170523
	group	Ct			average
GAPDH	NC	21.88	22.13	21.74	21.9167
	24hsiRNA	23.28	23.34	23.18	23.2667
	48hsiRNA	21.7	21.3	21.76	21.5867
	72hsiRNA				22.17
					21.89
					22.03
	group	Ct			average	ΔCt	ΔΔCt	2^-ΔΔCt
ERGIC3	NC	20.66	20.91	21.3	20.9567	-0.96	0	1
	24hsiRNA	25.89	25.49	25.62	25.6667	2.4	3.36	0.0973956
	48hsiRNA	23.98	23.84	24.15	23.99	2.40333	3.36333	0.0971708
	72hsiRNA				25.66	3.49	4.45	0.0457527
					24.37	2.48	3.44	0.0921418
					24.14	2.11	3.07	0.11908
0	24	48	72
1	0.127627	0.0807721	0.045753
1	0.135216	0.11636	0.11908
1	0.097396	0.097171	0.092142
